# Supplementary material
Source: PubMed Central journal article supplement (PMC6017458)
Supplement: molecules-23-00207-s001.pdf [file molecules-23-00207-s001.pdf]

# Comparison of binding affinities of water-soluble calixarenes with the organophosphorus nerve agent Soman (GD) and commonly-used nerve agent simulants

Jayne A. Ede <sup>1</sup>, Peter J. Cragg <sup>2</sup> and Mark R. Sambrook <sup>1,\*</sup>

## pH measurements

All pH measurements were made using a Metler Toledo SevenCompact pH/ion InLab<sup>®</sup> Pro ISM probe and data is presented in Table S1.

| Mol eq calix | pH Measurement of simulant in D2O |      |      |
|--------------|-----------------------------------|------|------|
|              | PMP                               | DEMP | DIMP |
| 0            | 2.86                              | 7.52 | 7.14 |
| 0.2          | 2.83                              | 3.63 | 3.27 |
| 0.4          | 2.63                              | 2.84 | 2.85 |
| 0.6          | 2.37                              | 2.6  | 2.74 |
| 0.8          | 2.34                              | 2.58 | 2.57 |
| 1            | 2.34                              | 2.49 | 2.44 |
| 1.2          | 2.24                              | 2.44 | 2.38 |
| 1.4          | 2.15                              | 2.26 | 2.31 |
| 1.6          | 2.14                              | 2.21 | 2.17 |
| 1.8          | 2.13                              | 2.11 | 2.08 |
| 2            | 2.08                              | 2.06 | 2.06 |
| 2.5          | 2                                 | 2.01 | 1.94 |
| 3            | 1.97                              | 1.91 | 1.84 |
| 4            | 1.82                              | 1.7  | 1.78 |
| 5            | 1.69                              | 1.67 | 1.64 |
| 7            | 1.58                              | 1.56 | 1.56 |
| 10           | missed                            | 1.5  | 1.44 |

Table S1. pH measurements of solutions of PMP, DEMP and DIMP (initial concentration = 0.01 M) in non-buffered D<sub>2</sub>O upon addition of SCX4.

## NMR Job Plot and Titration Data – *p*-sulfonatocalix[4]arene (SCX4)

Data fit plots obtained using WinEQNMR.<sup>1</sup>

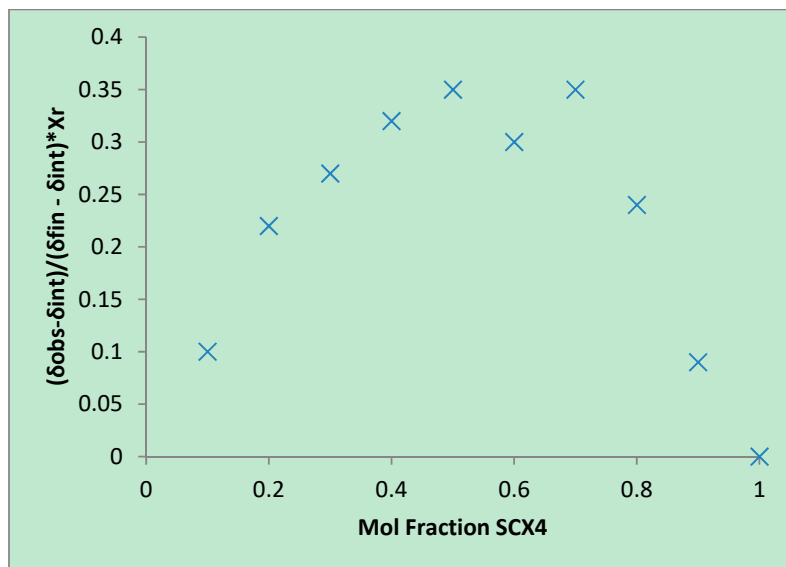

Figure S1. Job plot analysis of SCX4 and DEMP, following SCX4 CH<sub>2</sub> environment (D<sub>2</sub>O, 293 K). Total concentration 0.01M.

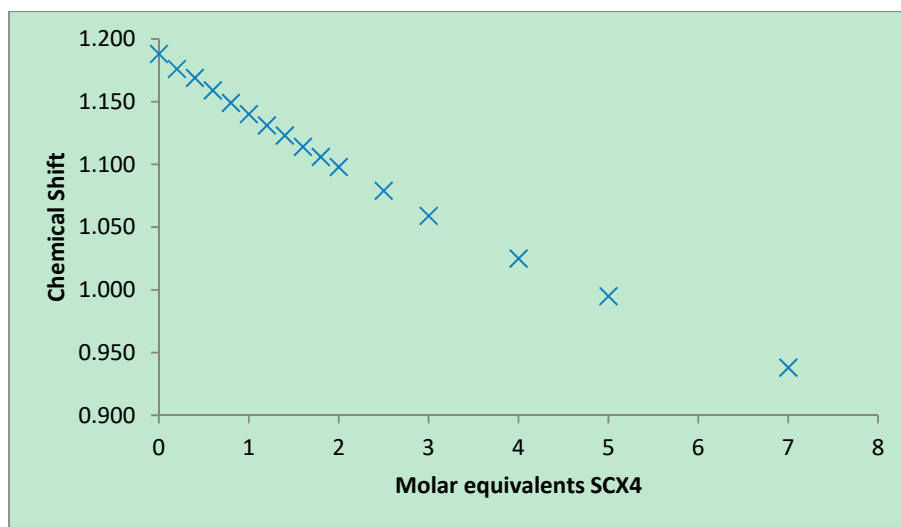

Figure S2. Titration plot of DEMP with SCX4 (D<sub>2</sub>O, 293K). Following DEMP ethyl-CH<sub>3</sub> proton environment. Initial concentration of DEMP 0.01M.

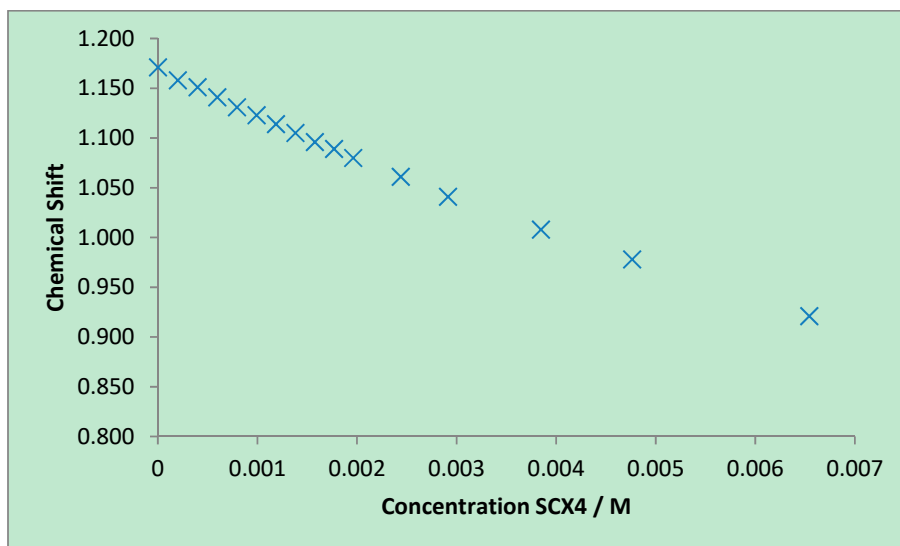

Figure S3. Titration plot of DEMP with SCX4 (0.25 M phosphate buffered D<sub>2</sub>O, 293K). Following DEMP ethyl-CH<sub>3</sub> proton environment. Initial concentration of DEMP 0.01M.

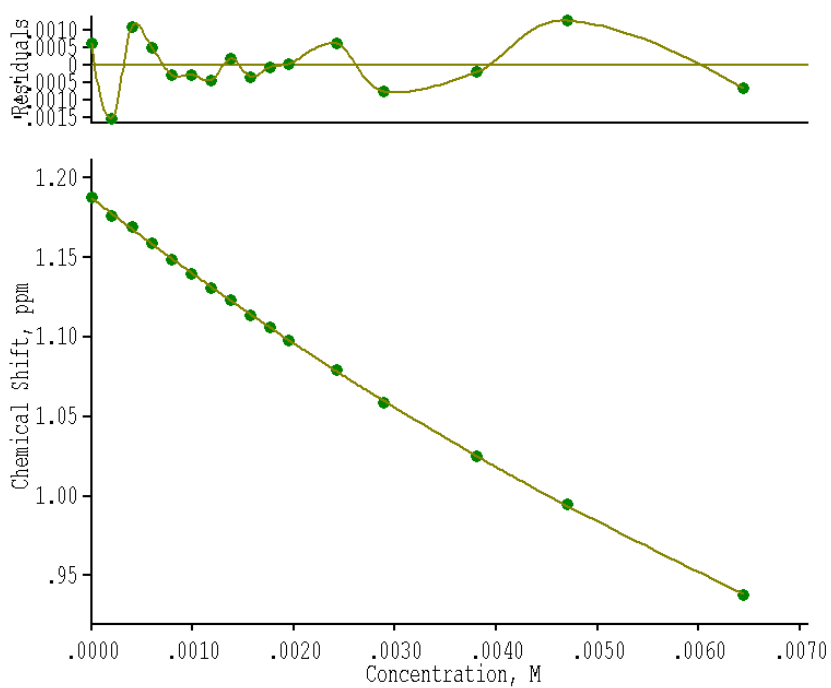

Figure S4. Data fitting of the titration of DEMP with SCX4 in D<sub>2</sub>O (293 K). Following DEMP ethyl-CH<sub>3</sub> proton environment.

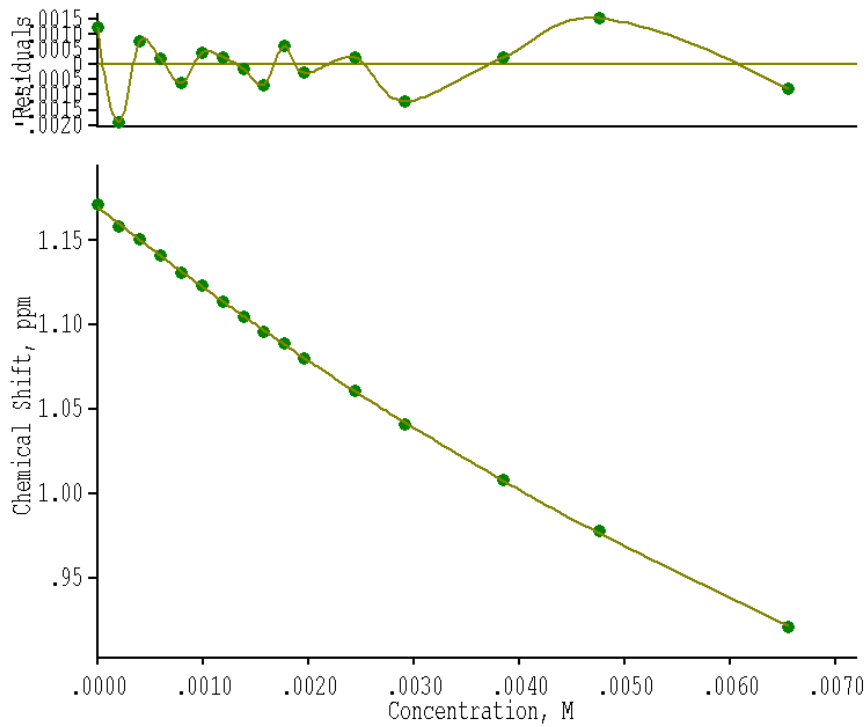

Figure S5. Data fitting of the titration of DEMP with SCX4 in 0.25 M phosphate buffered D<sub>2</sub>O (293 K). Following DEMP ethyl-CH<sub>3</sub> proton environment.

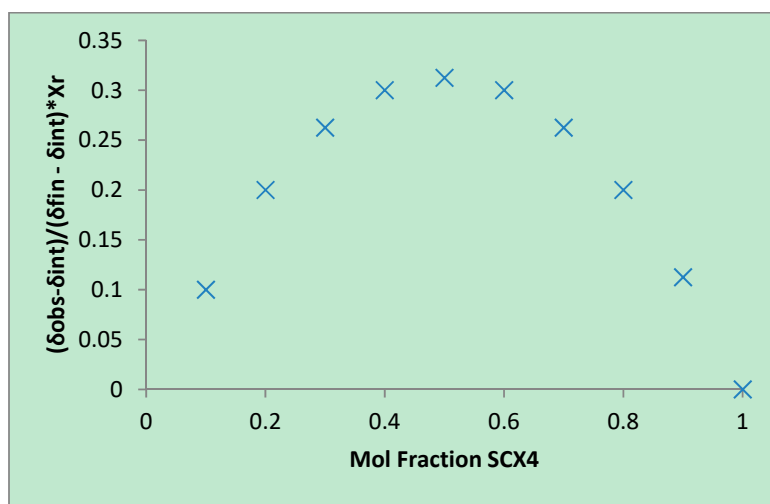

Figure S6. Job plot analysis of SCX4 and DIMP, following SCX4 CH<sub>2</sub> environment (D<sub>2</sub>O, 293 K). Total concentration 0.01M.

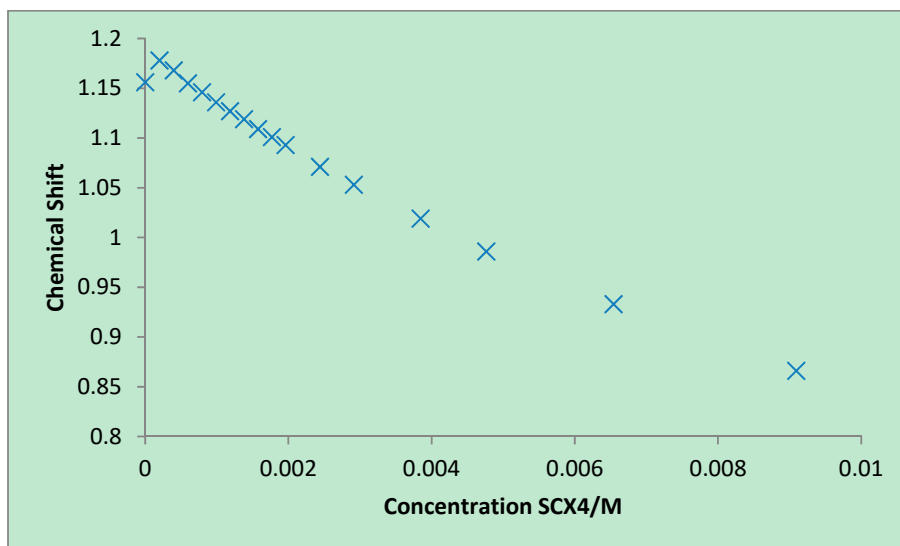

Figure S7. Titration plot of DIMP with SCX4 (D<sub>2</sub>O, 293K). Following DIMP alkyl-CH<sub>3</sub> proton environment. Initial concentration of DIMP 0.01M.

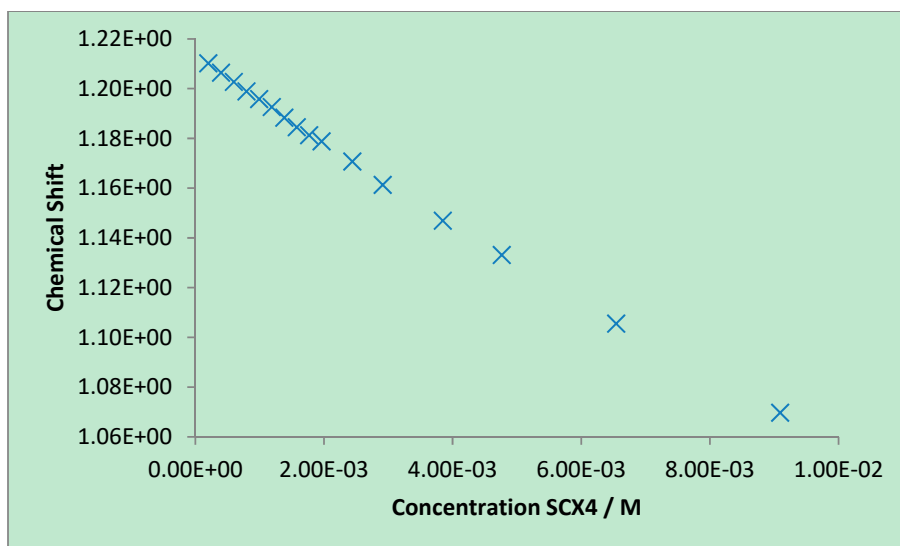

Figure S8. Titration plot of DIMP with SCX4 (0.25 M phosphate buffered D<sub>2</sub>O, 293K). Following DIMP alkyl-CH<sub>3</sub> proton environment. Initial concentration of DIMP 0.01M

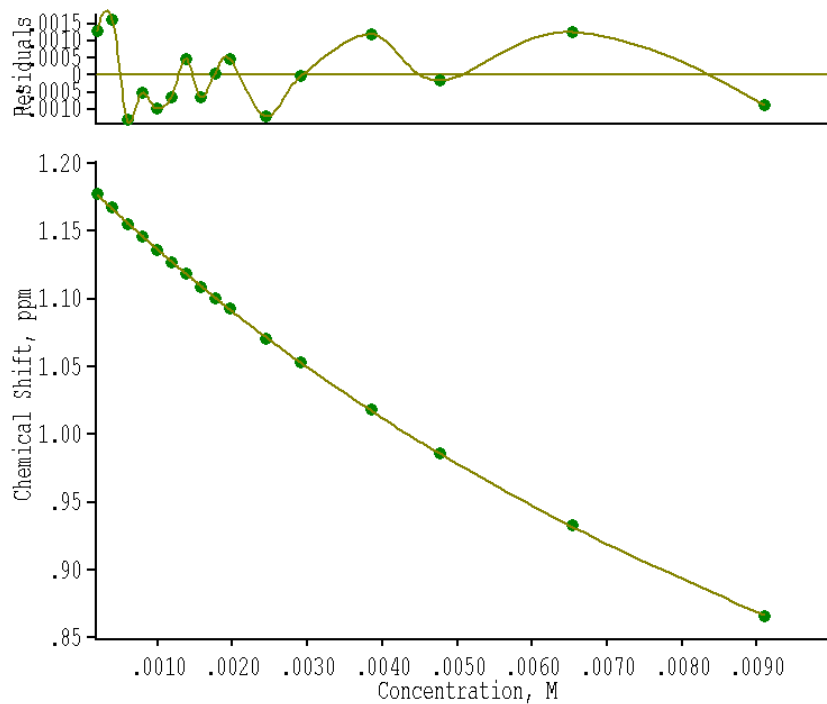

Figure S9. Data fitting of the titration of DIMP with SCX4 in D<sub>2</sub>O (293 K). Following DIMP alkyl-CH<sub>3</sub> proton environment.

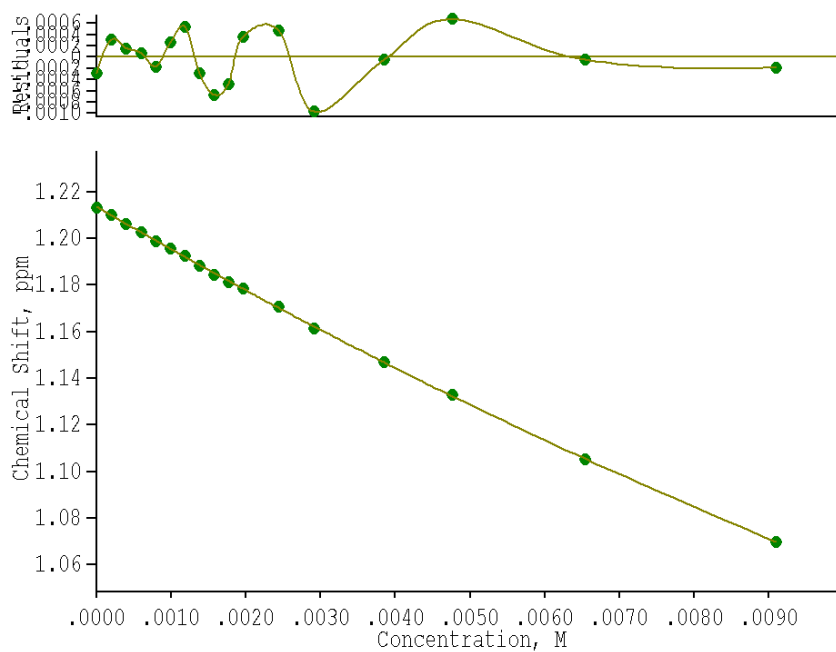

Figure S10. Data fitting of the titration of DIMP with SCX4 in 0.25 M phosphate buffered D<sub>2</sub>O (293 K). Following DIMP alkyl-CH<sub>3</sub> proton environment.

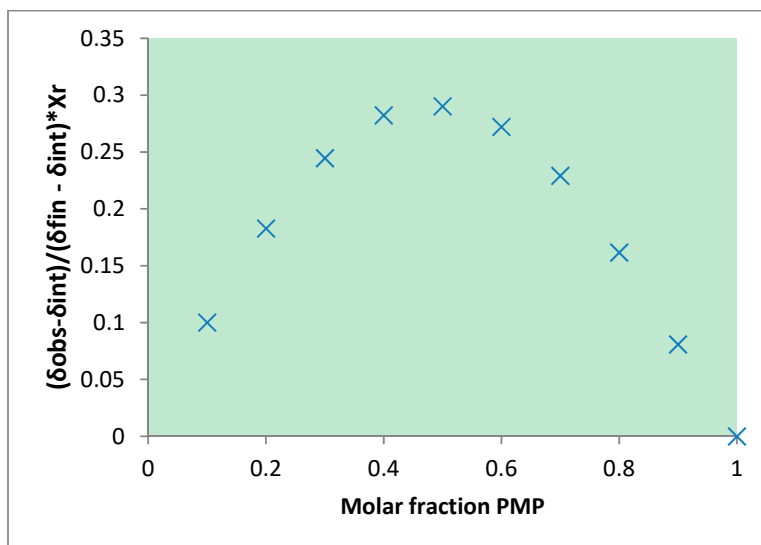

Figure S11. Job plot analysis of SCX4 and PMP, following PMP <sup>1</sup>Bu proton environment (D<sub>2</sub>O, 293K). Total concentration 0.01M.

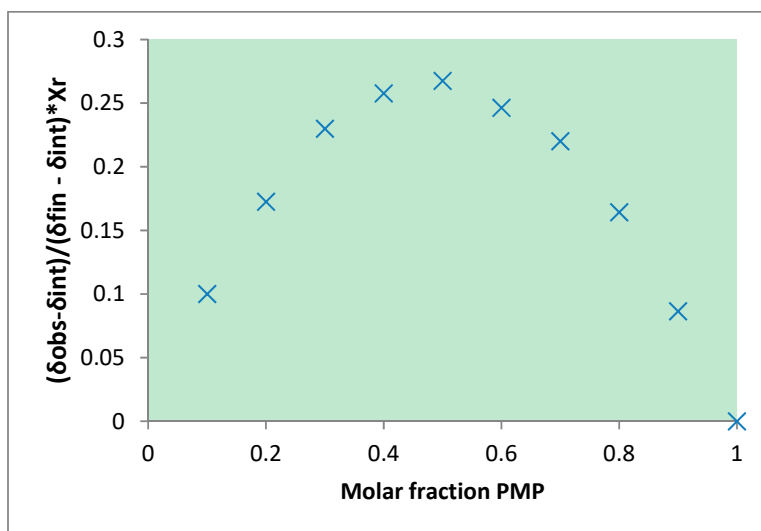

Figure S12. Job plot analysis of SCX4 and PMP, following PMP <sup>1</sup>Bu proton environment. (0.25 M phosphate buffered D<sub>2</sub>O, 293 K). Total concentration 0.01M.

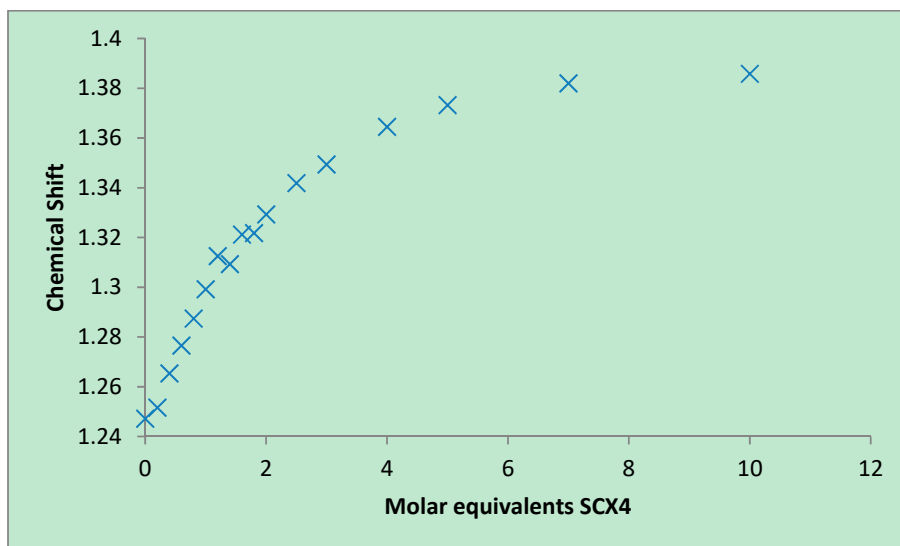

Figure S13. Titration plot of PMP with SCX4 (D<sub>2</sub>O, 293K). Following PMP P-Me proton environment. Initial concentration of PMP 0.01M.

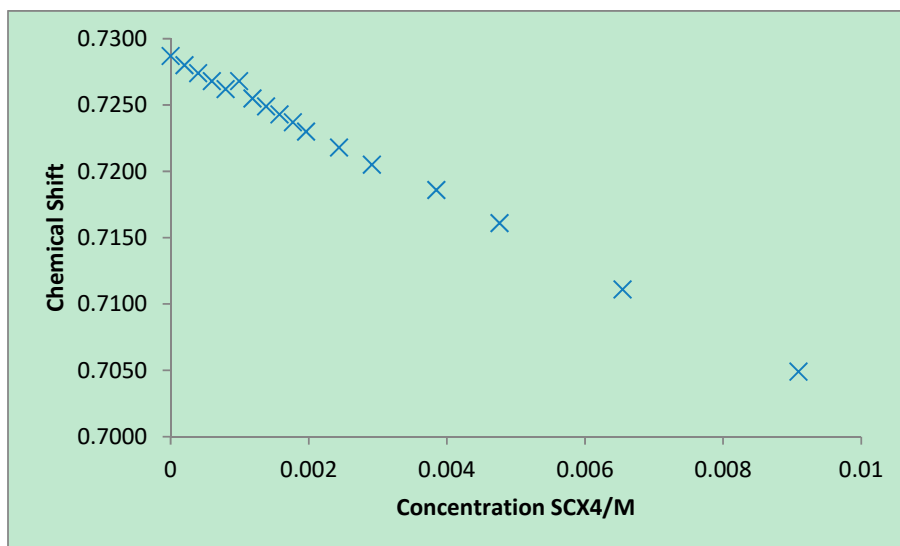

Figure S14. Titration plot of PMP with SCX4 (0.25 M phosphate buffered D<sub>2</sub>O, 293K). Following PMP <sup>t</sup>Bu proton environment. Initial concentration of PMP 0.01M.



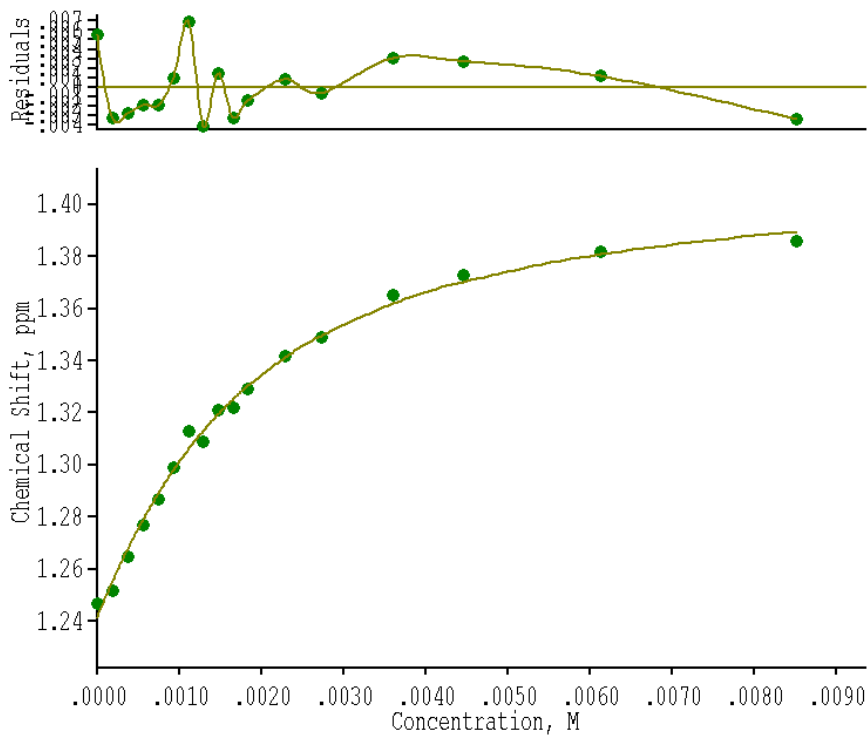

Figure S15. Data fitting of the titration of PMP with SCX4 in D<sub>2</sub>O (293 K). Following PMP P-Me proton environment.

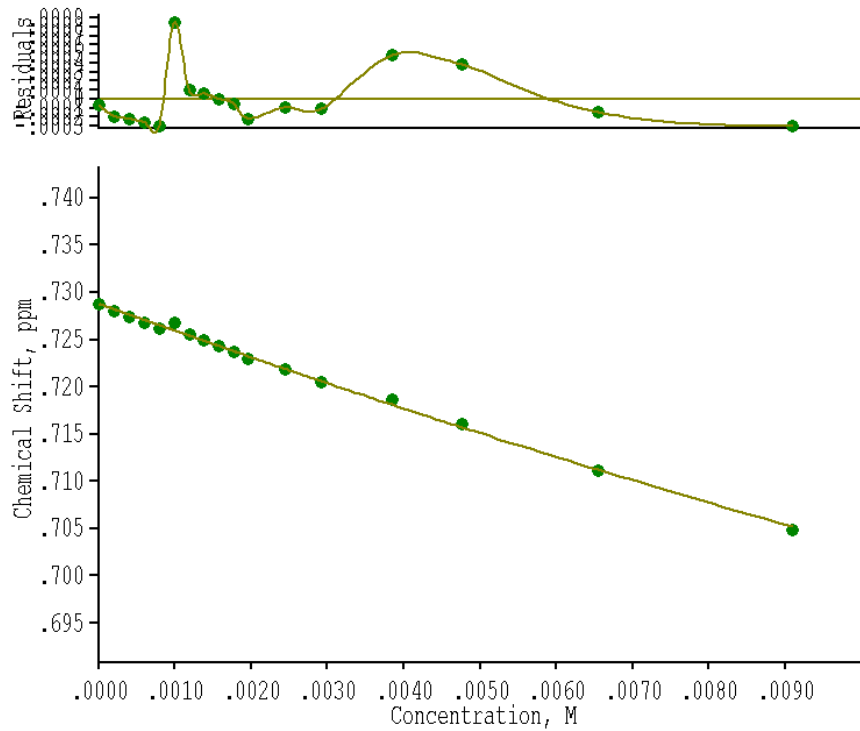

Figure S16. Data fitting of the titration of PMP with SCX4 in 0.25 M phosphate buffered D<sub>2</sub>O (293 K). Following PMP <sup>t</sup>Bu proton environment.

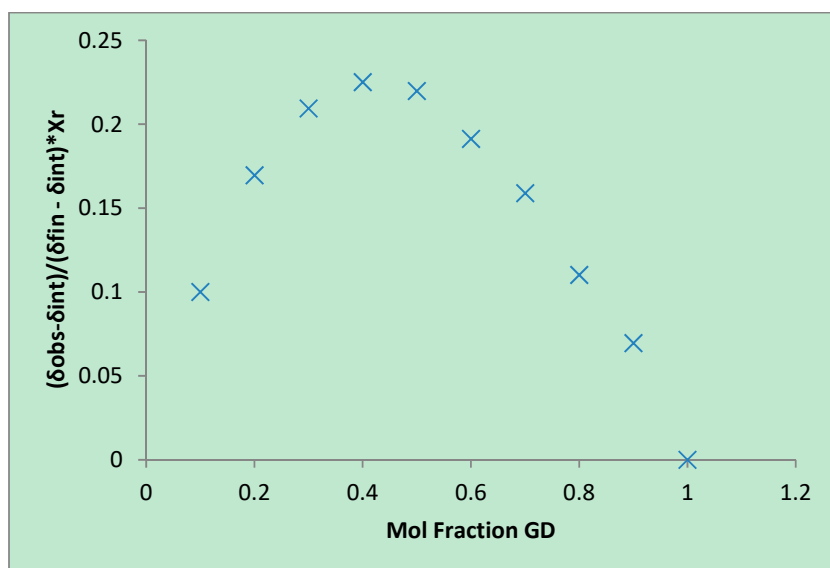

Figure S17. Job plot analysis of SCX4 and GD, following GD <sup>t</sup>Bu environment (D<sub>2</sub>O, 293 K). Total concentration 0.01M.

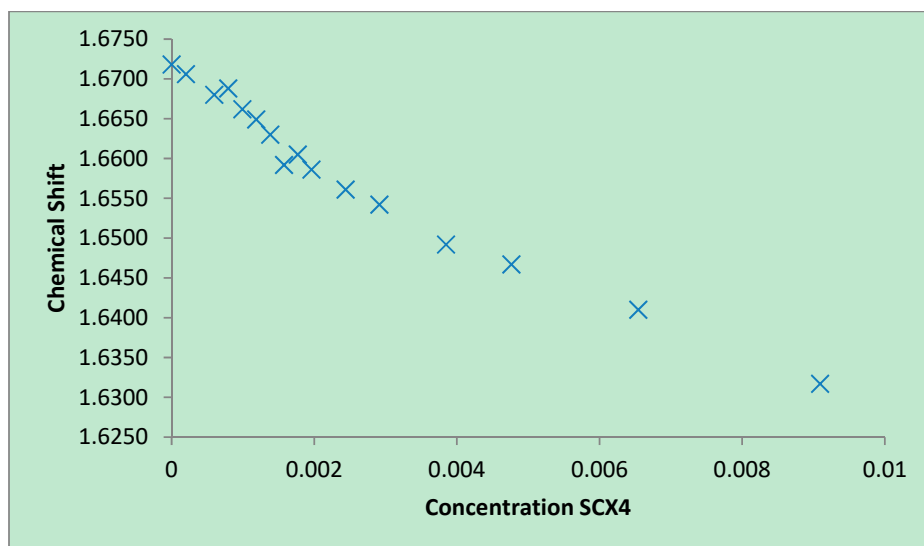

Figure S18. Titration plot of GD with SCX4 (0.25 M phosphate buffered D<sub>2</sub>O, 293K). Following GD P-Me proton environment. Initial concentration of DEMP 0.01M.

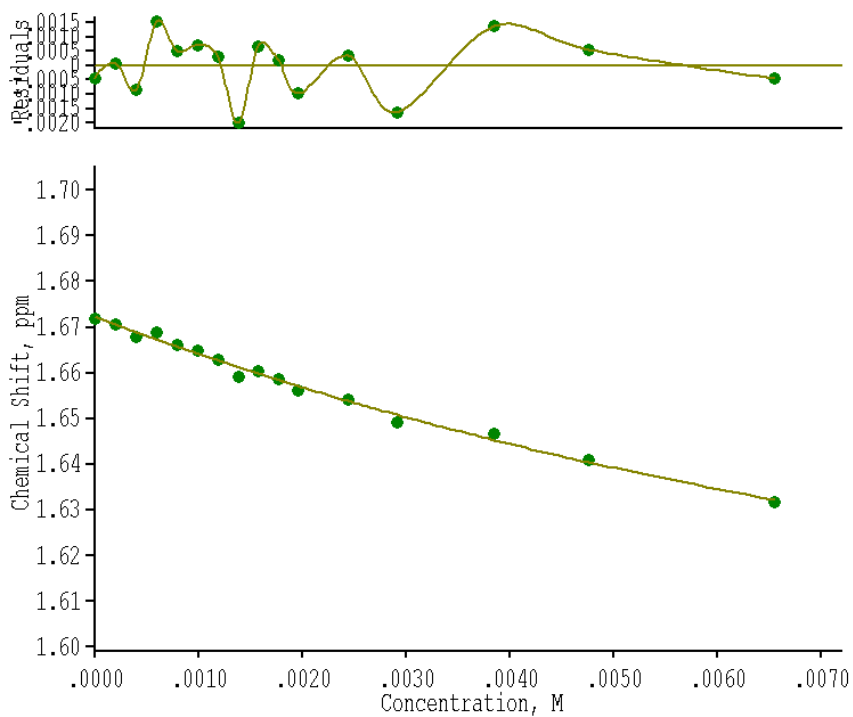

Figure S19. Data fitting of the titration of GD with SCX4 in 0.25 M phosphate buffered D<sub>2</sub>O (293 K). Following GD P-Me proton environment.

**NMR Job Plot and Titration Data – *p*-sulfonatocalix[6]arene (SCX6)**

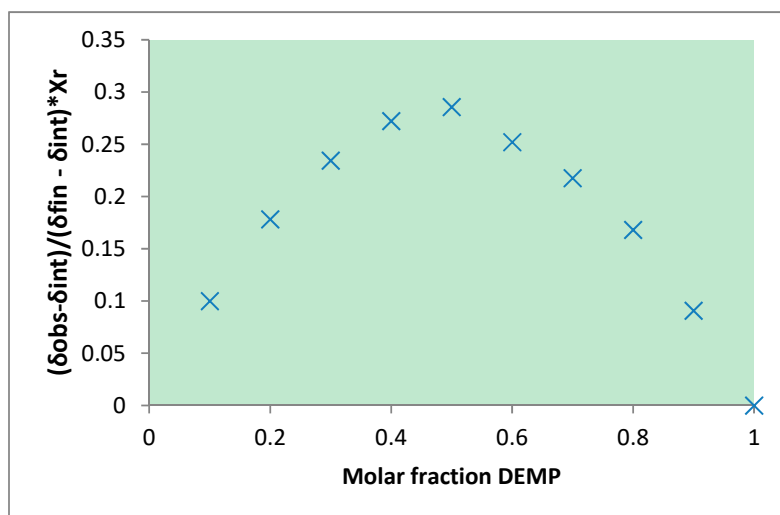

Figure S20. Job plot analysis of SCX6 and DEMP, following DEMP P-Me environment (D<sub>2</sub>O, 293 K). Total concentration 0.01M.

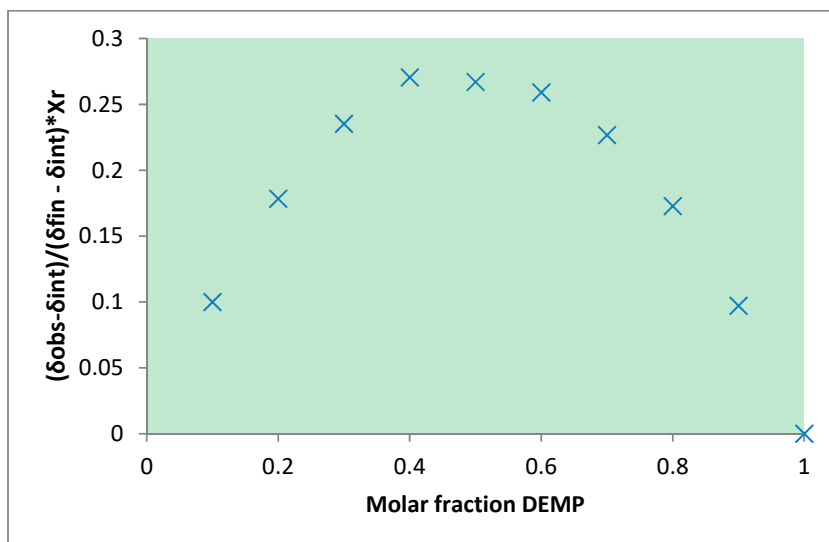

Figure S21. Job plot analysis of SCX6 and DEMP, following DEMP P-Me environment (0.25 M phosphate buffered D<sub>2</sub>O, 293 K). Total concentration 0.01M.

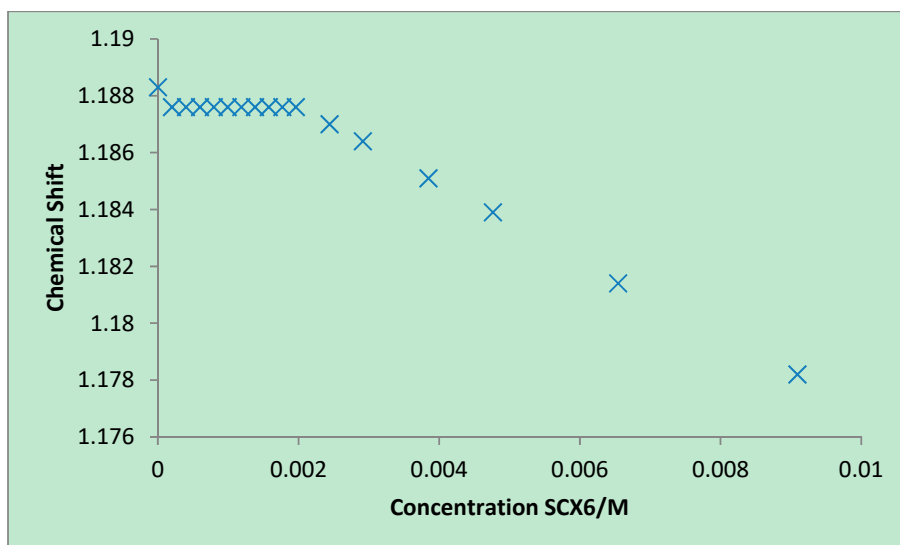

Figure S22. Titration plot of DEMP with SCX6 (D<sub>2</sub>O, 293K). Following DEMP ethyl-CH<sub>3</sub> proton environment. Initial concentration of DEMP 0.01M.

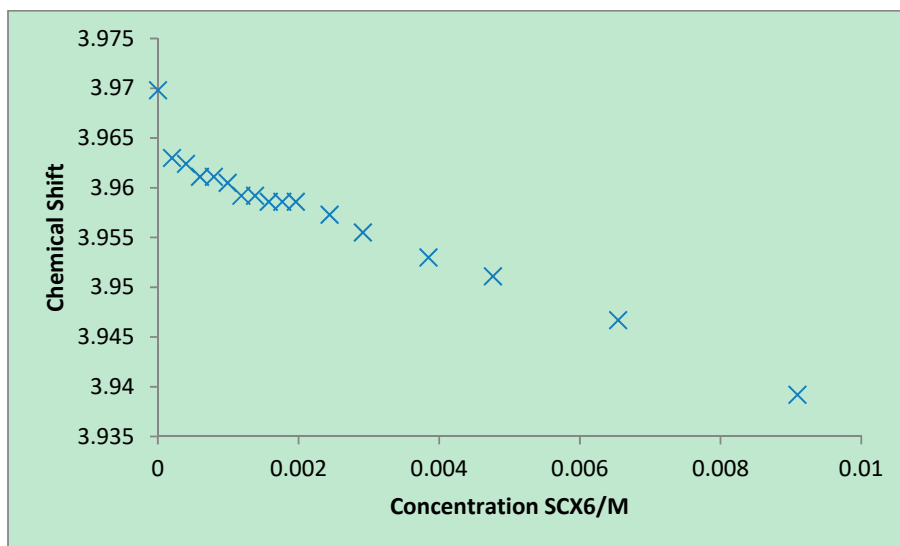

Figure S23. Titration plot of DEMP with SCX6 (0.25 M phosphate buffered D<sub>2</sub>O, 293K). Following DEMP ethyl-CH<sub>3</sub> proton environment. Initial concentration of DEMP 0.01M.

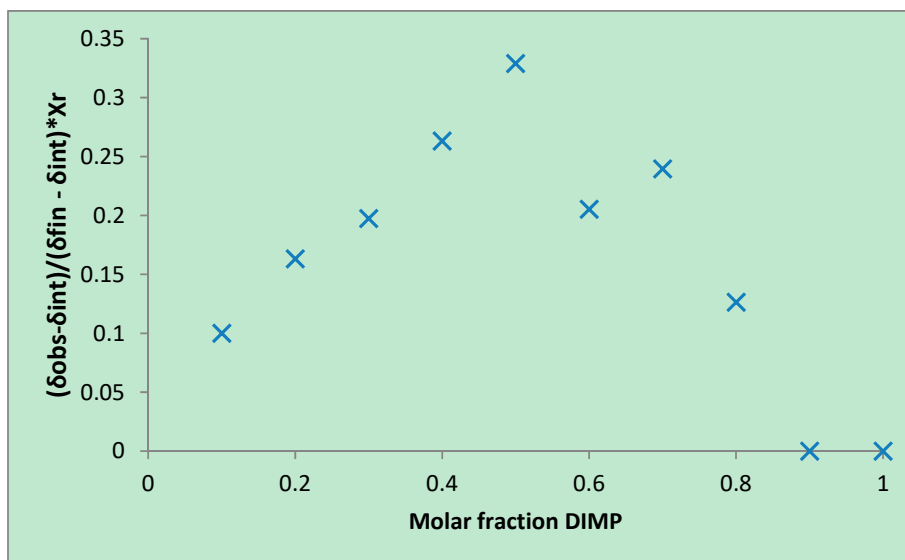

Figure S24. Job plot analysis of SCX6 and DIMP, following DIMP alkyl-CH<sub>3</sub> environment (D<sub>2</sub>O, 293 K). Total concentration 0.01M.

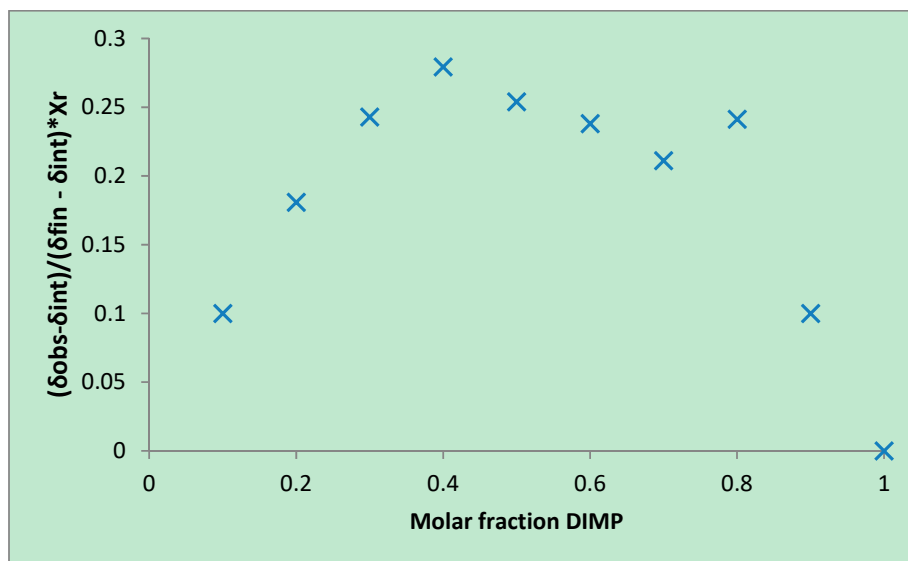

Figure S25. Job plot analysis of SCX6 and DIMP, following DIMP alkyl-CH<sub>3</sub> environment (0.25 M phosphate buffered D<sub>2</sub>O, 293 K). Total concentration 0.01M.

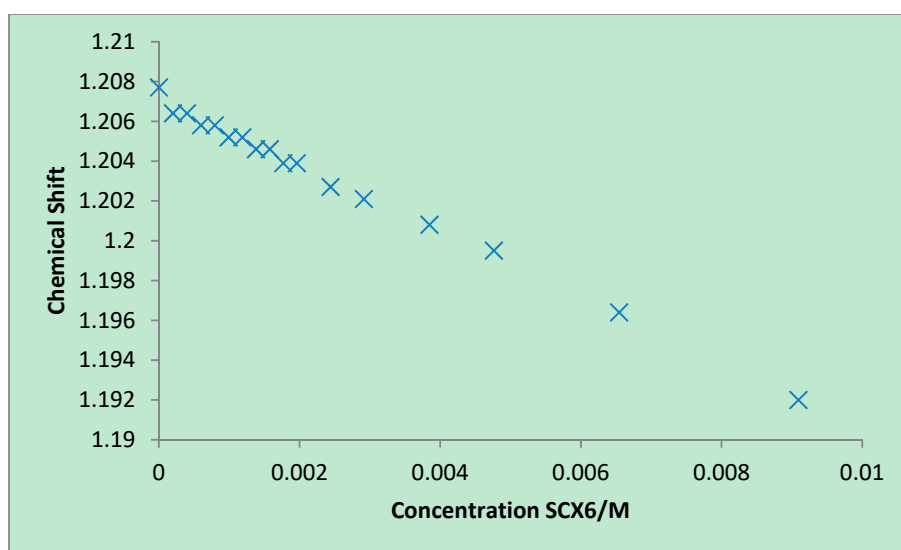

Figure S26. Titration plot of DIMP with SCX6 (D<sub>2</sub>O, 293K). Following DIMP alkyl-CH<sub>3</sub> proton environment. Initial concentration of DIMP 0.01M.

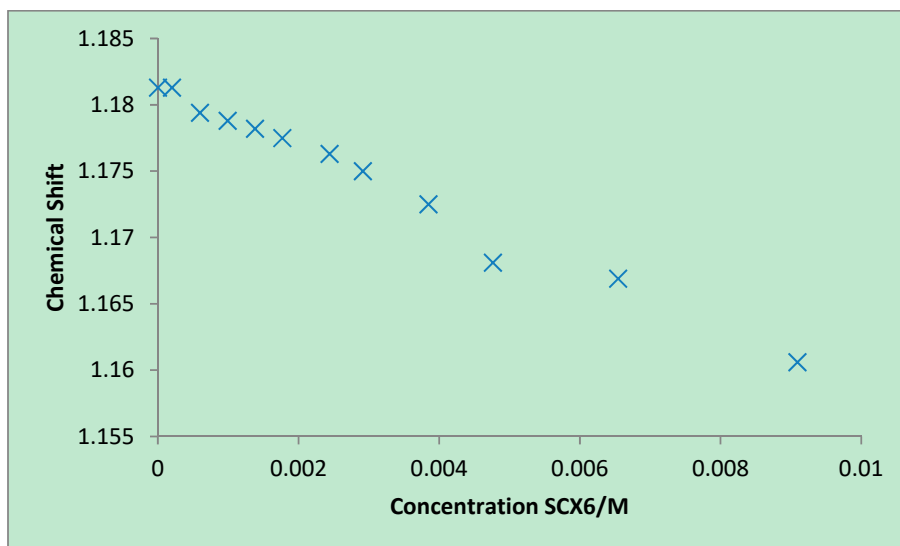

Figure S27. Titration plot of DIMP with SCX6 (0.25 M phosphate buffered D<sub>2</sub>O, 293K). Following DIMP alkyl-CH<sub>3</sub> proton environment. Initial concentration of DIMP 0.01M.

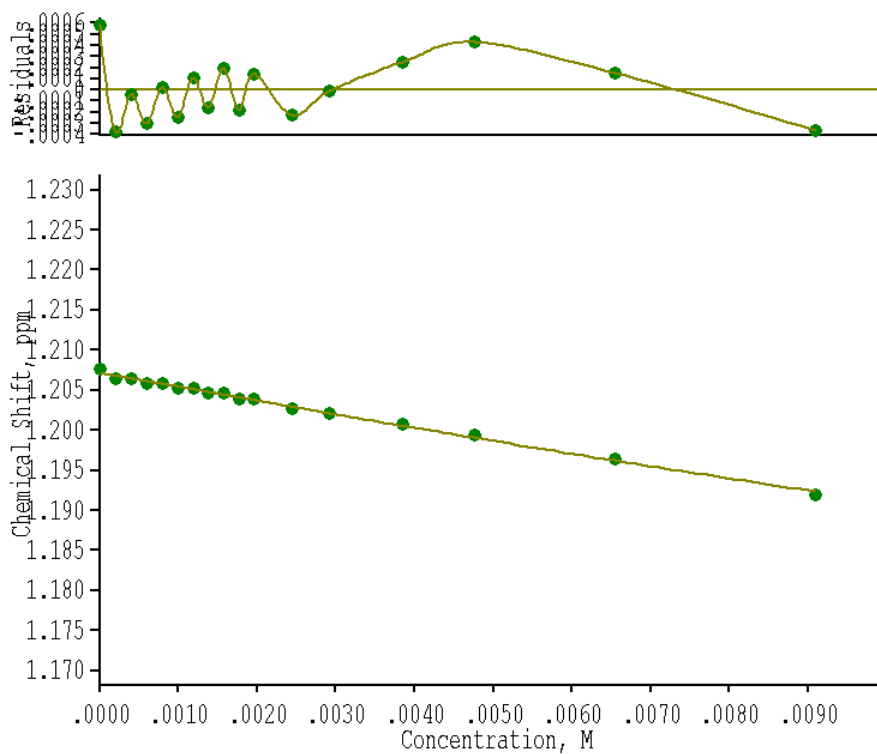

Figure S28. Data fitting of the titration of DIMP with SCX6 in D<sub>2</sub>O (293 K). Following DIMP alkyl-CH<sub>3</sub> proton environment.

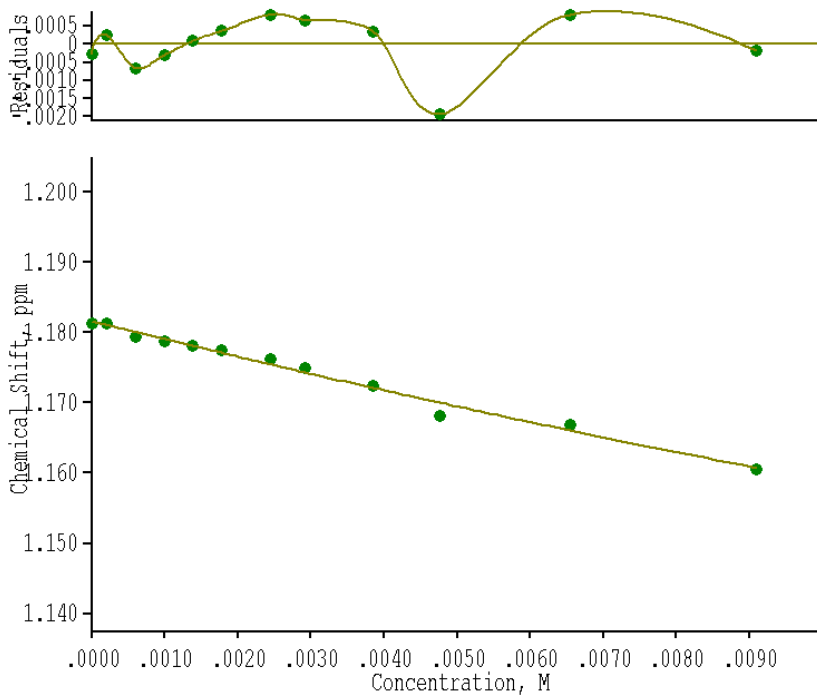

Figure S29. Data fitting of the titration of DIMP with SCX6 in 0.25 M phosphate buffered D<sub>2</sub>O (293 K). Following DIMP alkyl-CH<sub>3</sub> proton environment.

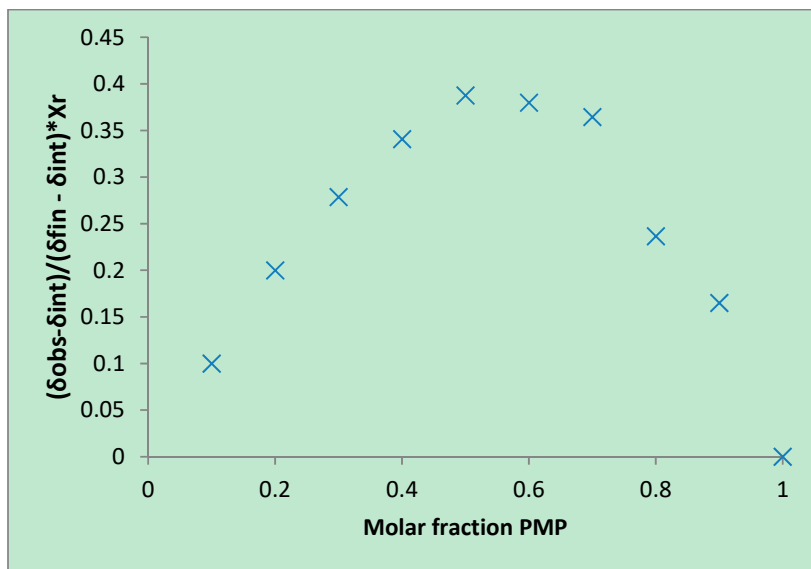

Figure S30. Job plot analysis of SCX6 and PMP, following PMP <sup>t</sup>Bu environment (D<sub>2</sub>O, 293 K). Total concentration 0.01M



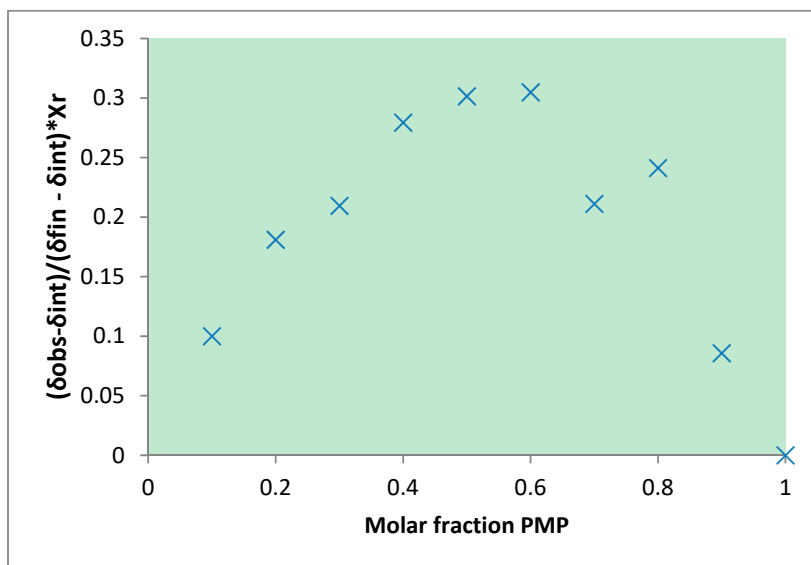

Figure S31. Job plot analysis of SCX6 and PMP, following PMP <sup>t</sup>Bu environment (0.25 M phosphate buffered D<sub>2</sub>O, 293 K). Total concentration 0.01M.

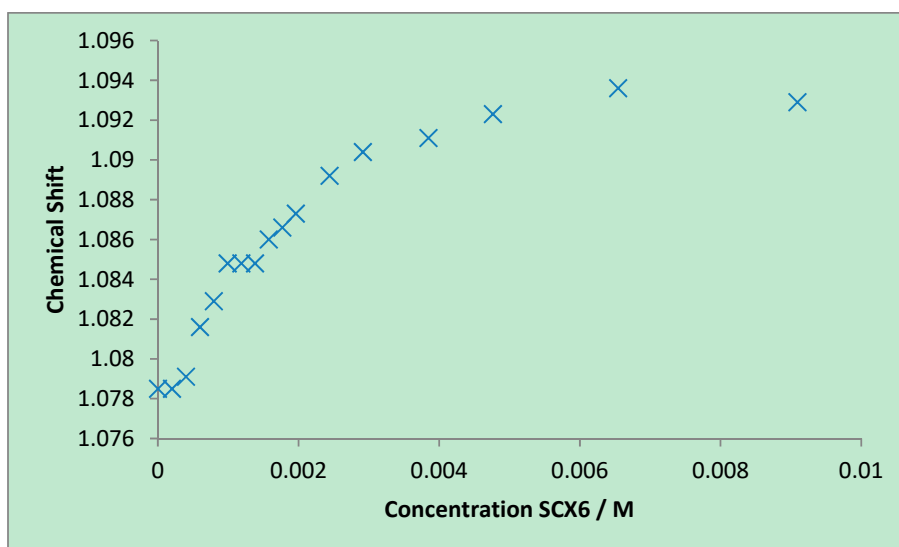

Figure S32. Titration plot of PMP with SCX6 (D<sub>2</sub>O, 293K). Following PMP P-Me proton environment. Initial concentration of PMP 0.01M.

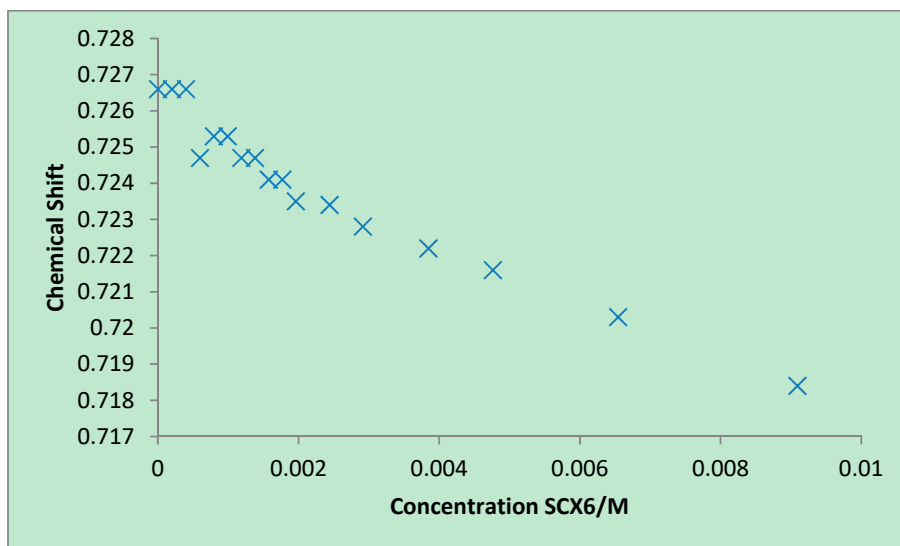

Figure S33. Titration plot of PMP with SCX6 (0.25 M phosphate buffered D<sub>2</sub>O, 293K). Following PMP <sup>t</sup>Bu proton environment. Initial concentration of PMP 0.01M.

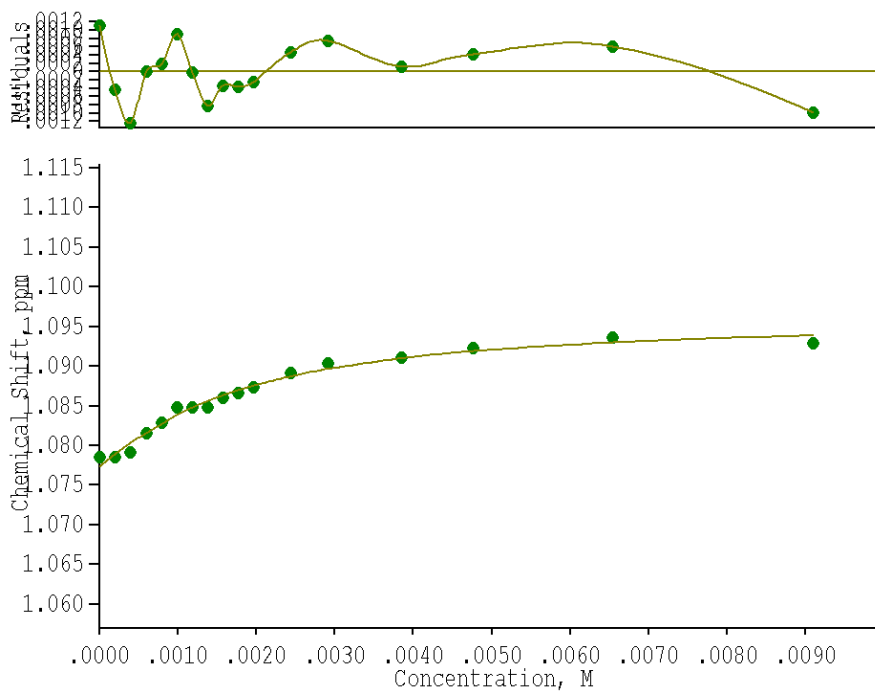

Figure S34. Data fitting of the titration of PMP with SCX6 in D<sub>2</sub>O (293 K). Following PMP P-Me proton environment.

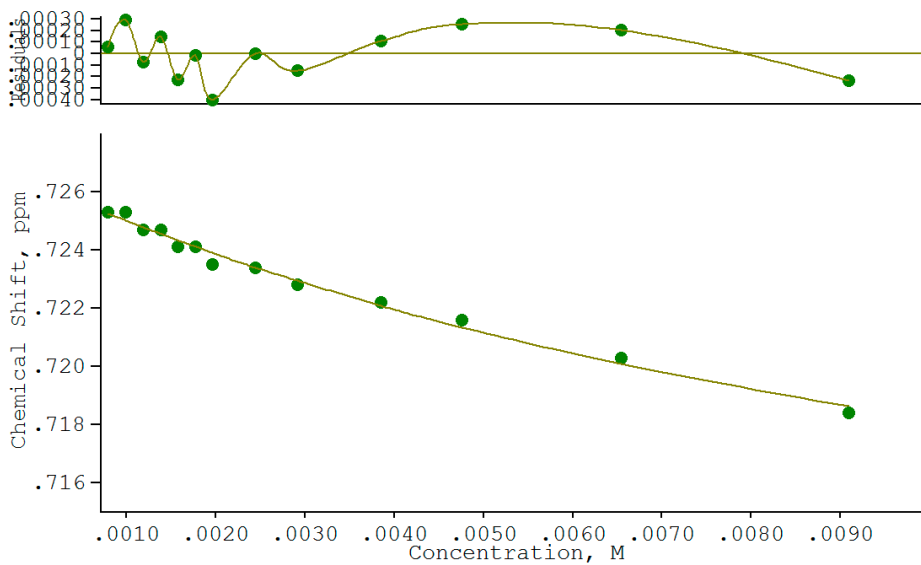

Figure S35. Data fitting of the titration of PMP with SCX6 in 0.25 M phosphate buffered D<sub>2</sub>O (293 K). Following PMP <sup>t</sup>Bu proton environment.

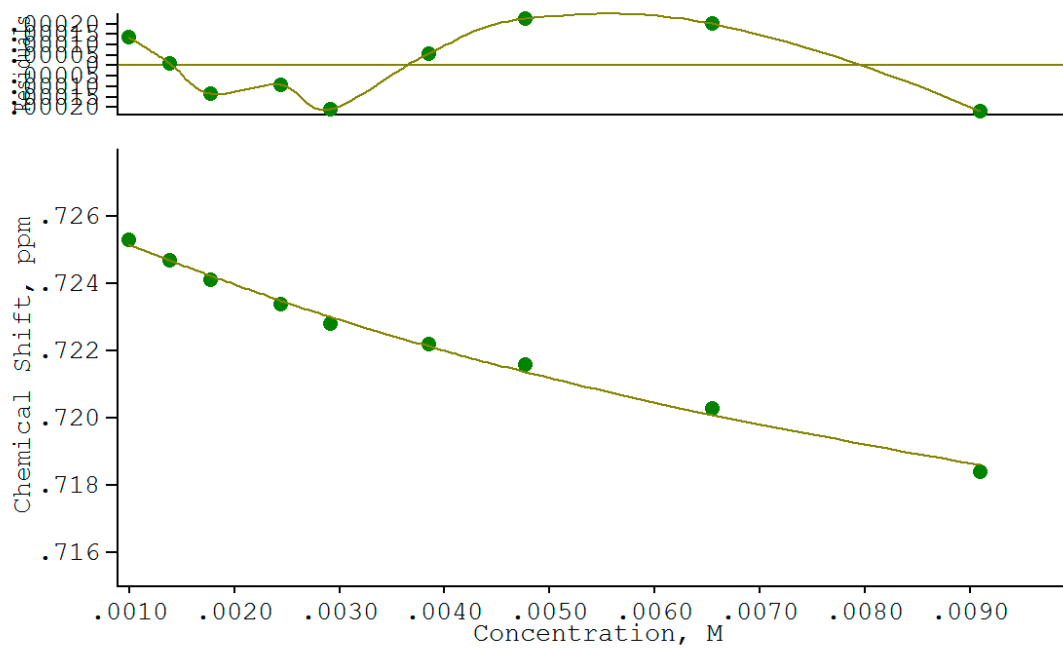

Figure S36. Data fitting of the titration of PMP, using selected data, with SCX6 in 0.25 M phosphate buffered D<sub>2</sub>O (293 K). Following PMP <sup>t</sup>Bu proton environment.

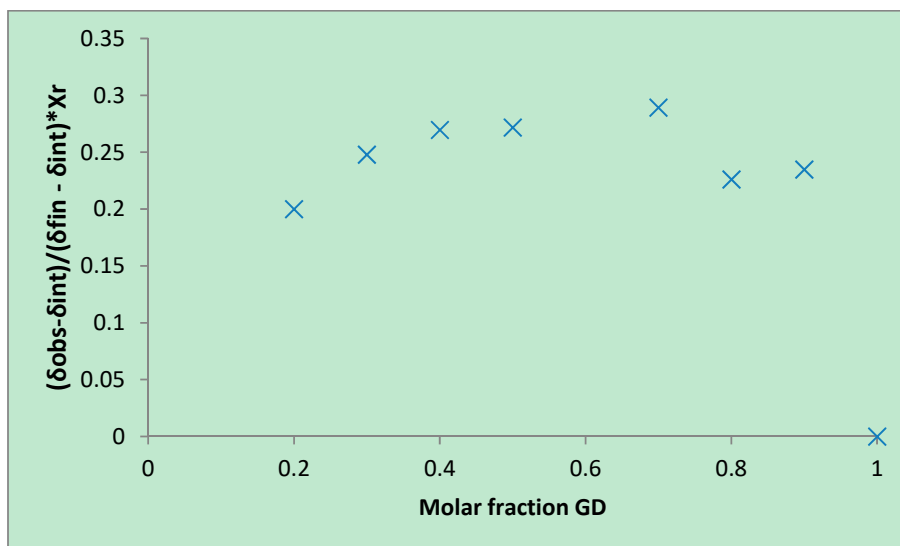

Figure S37. Job plot analysis of SCX6 and GD, following GD <sup>t</sup>Bu environment (0.25 M phosphate buffered D<sub>2</sub>O, 293 K). Total concentration 0.01M.

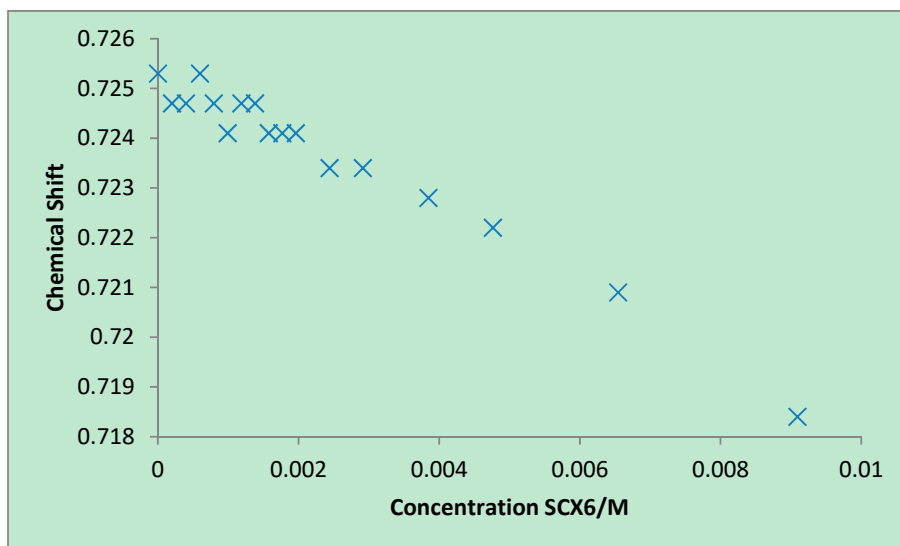

Figure S38. Job plot analysis of SCX6 and GD, following GD <sup>t</sup>Bu environment (0.25 M phosphate buffered D<sub>2</sub>O, 293 K). Total concentration 0.01M.

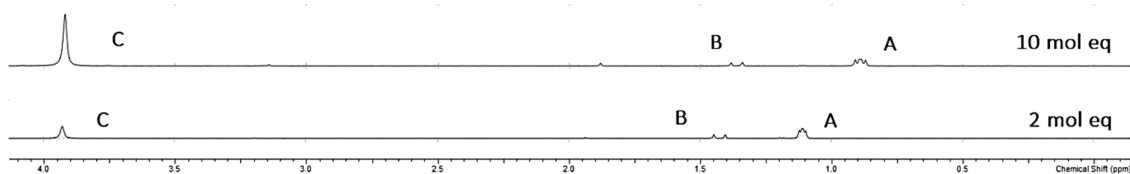

Figure S39.  $^1\text{H}$  NMR spectra of DIMP in the presence of (bottom) 2 molar equivalents of SCX4 and (top) 10 molar equivalents of SCX4. Proton environment A is observed to shift upfield from 1.1398 ppm to 0.8714 ppm ( $\Delta\delta = -0.2684$  ppm)

#### References

1. Hynes, M.J., EQNMR: a computer program for the calculation of stability constants from nuclear magnetic resonance chemical shift data, **1993**, 311.

Content includes material subject to © Crown copyright (2018), Dstl. This material is licensed under the terms of the Open Government Licence except where otherwise stated. To view this licence, visit <http://www.nationalarchives.gov.uk/doc/open-government-licence/version/3> or write to the Information Policy Team, The National Archives, Kew, London TW9 4DU, or email: [psi@nationalarchives.gsi.gov.uk](mailto:psi@nationalarchives.gsi.gov.uk)
